# Supplementary material for: iSBatch: a batch-processing platform for data analysis and exploration of live-cell single-molecule microscopy images and other hierarchical datasets
Source: Royal Society of Chemistry journal article supplement (doi:10.1039/c5mb00321k), 2015-07-22
Supplement: c5mb00321k3.pdf [file c5mb00321k3.pdf]

## Supplementary Materials

### Raw databases

Databases may be directly obtained from our server, following the link:

<http://singlemolecule.nl/~vcaldas/iSBatch/>

In the iSBatch main windows, there is also a direct link for the user directly access the same folder.

The datasets are available in 2 forms:

- Full Dataset – 15Gb - Contains all raw data used as a test dataset in this paper.
- Minimal Dataset - 3.0Gb – Reduced dataset containing the same structure but less files; It allows the same analysis as the full dataset.

MatLab file containing cell outlines is provided with each dataset.

An online tutorial is available online at <http://singlemolecule.github.io/iSBatch/>. Issues, bugs or requests should be directly addresses to the authors at <https://github.com/SingleMolecule/iSBatch/issues>.

### Installation

#### For ImageJ users:

1. Download the last iSBatch version in our online repository:  
<https://sourceforge.net/projects/isbatch/>
2. Follow a tutorial available at:  
[http://imagejdocu.tudor.lu/doku.php?id=howto:plugins:how\\_to\\_install\\_a\\_plugin](http://imagejdocu.tudor.lu/doku.php?id=howto:plugins:how_to_install_a_plugin)

#### For Fiji Users (Recommended):

1. Visit our website containing all instructions.

<http://singlemolecule.github.io/iSBatch/2015/05/isbatch-installation-for-fiji-users/>

This installation is preferred since the user will receive the last updates directly when starting Fiji.
